# Supplementary material
Source: Springer Nature journal article supplement (https://www.springermedizin.de/resource/supplementary/13054_2013_2875_MOESM17_ESM.pdf/9714066)

A

## Hypnogram

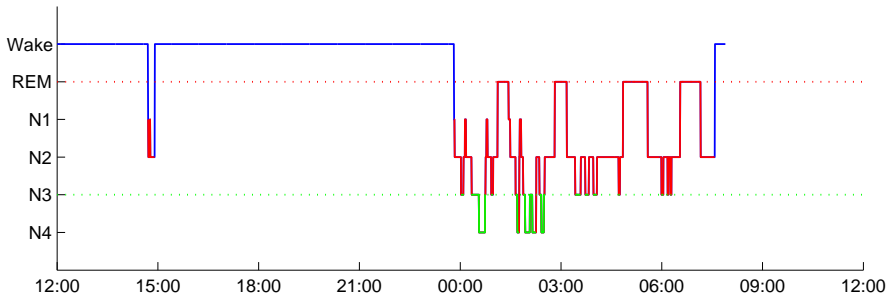

B

## IDOS

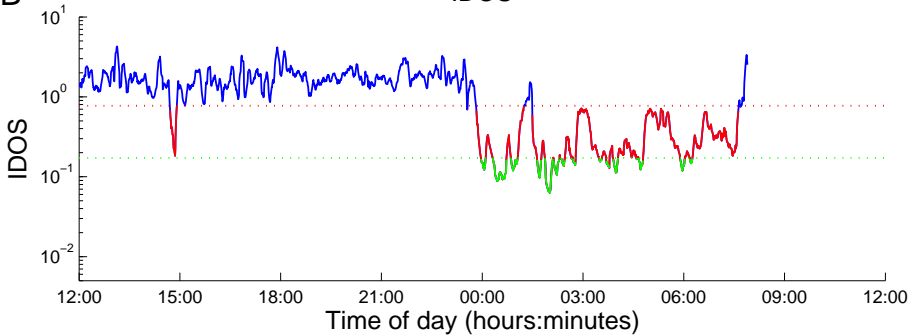

Supplement: MOESM17 [file 9714066]
